# Supplementary material for: Pomace Olive Oil Concentrated in Triterpenic Acids Restores Vascular Function, Glucose Tolerance and Obesity Progression in Mice
Source: MDPI journal article supplement (doi:10.3390/nu12020323), 2020-01-26
Supplement: s1 [file s1]

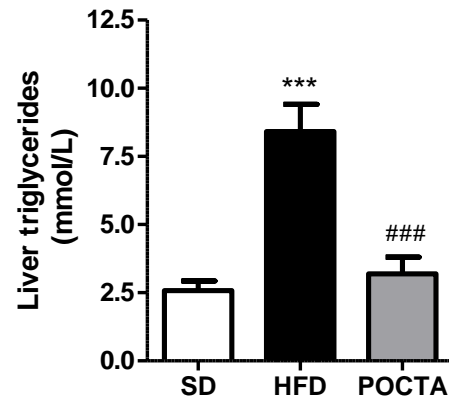

**Figure S1.** The effect of a POCTA diet on liver triglycerides in mice fed a standard diet (SD), high fat diet (HFD) or a diet supplemented in olive pomace oil with high concentration in triterpenic acids (POCTA). Values are mean  $\pm$  SEM (n =5-10) and are normalized relative to the control group. \*\*\*P<0.001 vs SD; ###P<0.001 vs HFD.
